Full Title: Using rapid response system trigger clusters to characterize patterns of clinical deterioration among hospitalized adult patients

Co-Authors: Rebecca J. Piasecki, PhD, RN,<sup>A</sup> Elizabeth A. Hunt, MD, MPH, PhD,<sup>A</sup> Nancy Perrin, PhD,<sup>A</sup> Erin M. Spaulding, PhD, RN,<sup>A</sup> Bradford Winters, MD, PhD,<sup>A</sup> Laura Samuel, PhD, MSN, RN,<sup>A</sup> Patricia M. Davidson, PhD, MEd, RN,<sup>B</sup> Nisha Chandra Strobos, MD,<sup>A</sup> Matthew Churpek, MD, MPH, PhD,<sup>C</sup> and Cheryl R. Himmelfarb, PhD, RN,<sup>A</sup> for the American Heart Association's Get With The Guidelines<sup>®</sup>-Resuscitation Investigators

- A. Johns Hopkins University
- B. University of Wollongong Australia
- C. University of Wisconsin-Madison

Corresponding Author Information:

Rebecca J. Piasecki

Email: [rpiasec1@jhmi.edu](mailto:rpiasec1@jhmi.edu)

Johns Hopkins University School of Nursing

Student House 310

525 N. Wolfe St.

Baltimore, MD 21205

## Abstract

**Background:** Many rapid response system (RRS) events are activated using multiple triggers. However, the patterns in which RRS triggers co-occur to activate the medical emergency team (MET) to respond to RRS events is unknown. The purpose of this study was to identify and describe the patterns (RRS trigger clusters) in which RRS triggers co-occur when used to activate the MET and determine the association of these clusters with outcomes using a sample of hospitalized adult patients.

**Methods:** RRS events among adult patients from January 2015 to December 2019 in the Get With The Guidelines- Resuscitation registry's MET module were examined (n=134,406). A combination of cluster analyses methods was performed to group patients into RRS trigger clusters based on the triggers used to activate their RRS events. Pearson's chi-squared and ANOVA tests were used to examine differences in patient characteristics across RRS trigger clusters. Multilevel logistic regression was used to examine the associations between RRS trigger clusters and outcomes following RRS events.

**Results:** Six RRS trigger clusters were identified in the study sample. The RRS triggers that predominantly identified each cluster were as follows: tachypnea, new onset difficulty in breathing, and decreased oxygen saturation (Cluster 1); tachypnea, decreased oxygen saturation, and staff concern (Cluster 2); respiratory depression, decreased oxygen saturation, and mental status changes (Cluster 3); tachycardia and staff concern (Cluster 4); mental status changes (Cluster 5); hypotension and staff concern (Cluster 6). Significant differences in patient characteristics were observed across RRS trigger clusters. Patients in Clusters 3 and 6 were associated with an increased likelihood of in-hospital cardiac arrest (IHCA [ $p < 0.01$ ]), while Cluster

4 was associated with a decreased likelihood of IHCA ( $p < 0.01$ ). All clusters were associated with an increased risk of mortality ( $p < 0.01$ ).

**Conclusions:** We discovered six novel RRS trigger clusters with differing relationships to adverse patient outcomes following RRS events. RRS trigger clusters may prove crucial in clarifying the associations between RRS events and adverse outcomes and may aid in clinician decision-making during RRS events.

## 1 Introduction

2 Since the Institute for Healthcare Improvement in the United States (US) first  
3 recommended the use of rapid response systems (RRSs) to improve care for deteriorating  
4 inpatients on general hospital wards, they have been widely implemented in many countries,  
5 including the US (1-5). RRSs consist of afferent limbs – detecting and activating responses to  
6 acutely deteriorating patients – and efferent limbs – providing interventions via specialized teams  
7 of clinicians to stabilize deterioration processes and avoid adverse outcomes. These teams that  
8 function within RRSs provide urgent interventions for clinically deteriorating patients with the  
9 goal of avoiding adverse outcomes, such as in-hospital cardiac arrest (IHCA) and mortality (6-9).  
10 While these teams have established standardized nomenclature based on the clinicians involved  
11 (e.g., nurse led teams are known as Rapid Response Teams, or RRTs, and Medical Emergency  
12 Teams, or METs, also include physicians on the team), for simplicity, here we will refer to all  
13 version of these teams as METs. RRSs also include administrative components, such as data  
14 management and analysis (7).

15 RRSs decrease the incidence of non-intensive care unit (non-ICU) IHCAs in adults by up to  
16 33% (8,10-12), but their impacts on other adverse outcomes are not clear (3-5,8,10-13).  
17 Increased understanding of key aspects of RRSs, such as RRS triggers, may improve RRS  
18 performance and clarify the impact RRSs have on a variety of adverse outcomes for hospitalized  
19 patients. RRS triggers are observations or reports of acute changes in a patient’s health that  
20 indicate the patient may be experiencing a serious life-threatening clinical deterioration requiring  
21 urgent interventions and are used to activate the MET. Up to 44% of adult RRS events are  
22 activated using multiple RRS triggers (14,15), and adult patients whose RRS events were activated

1 using two or more triggers have been associated with higher incidences of IHCA and hospital  
2 mortality compared to those whose RRS events were activated by single triggers (16,17).  
3 Understanding of the patterns in which multiple RRS triggers co-occur may prove crucial in  
4 optimizing the care of hospitalized patients with multiple RRS triggers present at the time of RRS  
5 activation. However, these patterns have yet to be explored.

6 The patterns in which RRS triggers occur together resulting in a RRS event activation can  
7 be described as RRS trigger clusters. The concept of RRS trigger clusters is derived from symptom  
8 clusters – groups of distinct yet related symptoms that tend to occur together in a given disease  
9 process – and can be used to better understand disease processes and outcomes and help  
10 clinicians more effectively intervene while at the bedside during a RRS event (18). RRS trigger  
11 clusters are therefore groups of distinct, yet related individual RRS triggers that tend to co-occur  
12 during clinical deterioration processes leading to MET activation. Understanding how RRS trigger  
13 clusters are associated with outcomes can provide a more complete picture of clinical  
14 deterioration processes and can help researchers and clinicians develop strategies to optimize  
15 RRSs and further reduce the incidence of adverse outcomes for hospitalized patients.

## 16 **Purpose**

17 The purpose of this study was to identify RRS trigger clusters among a sample of  
18 hospitalized adult patients who experienced a RRS event in the US and examine how those  
19 clusters were related to patient outcomes following RRS events.

## 20 **Methods**

### 21 **Data Source**

1           This cross-sectional study used the de-identified data stored in the MET module of the  
2 American Heart Association’s Get With The Guidelines® – Resuscitation (GWTG-R) registry.  
3 Established in 1999, this registry was created as a quality improvement registry by which  
4 participating hospitals could benchmark their own performance and compare their resuscitation  
5 practices and outcomes to other participating hospitals. The MET module collects data on any  
6 patient, visitor, employee, or hospital staff member who experiences a RRS event at a  
7 participating site (19-21). Despite its name, the MET module is inclusive of many RRS data  
8 elements, not just the response team. The rigorous training and data collection procedures used  
9 to gather data for this registry have been described previously (17,20).

10           An IRB waiver of consent was obtained for this study.

### 11 **Study Sample**

12           Records for adult patients who were hospitalized between January 2015 through  
13 December 2019 were used. Since we were interested in examining the patterns in which multiple  
14 RRS triggers were used to activate METs, only RRS events activated using more than one RRS  
15 trigger were considered. A total of 275,062 initial RRS events were identified during the study  
16 period. Approximately 49% (n=134,406) of those RRS events had at least two RRS triggers  
17 documented as the reason for activation of the MET and were included in the sample.

18           Adult patients were defined as those aged 18 years or older at the time of their initial RRS  
19 event. We excluded any hospital employees, staff members, visitors, outpatients, or patients less  
20 than 18 years old at the time of their initial RRS event. Only data from the initial RRS event in  
21 each admission (or index event) was analyzed. Data from any additional RRS events that occurred  
22 during the same admission were excluded.

## 1 **Study Variables**

### 2 *RRS Trigger Variables*

3 Table 1 lists the individual RRS triggers collected in the GWTG-R MET module. Using  
4 standardized training to extract information on RRS events from patients' electronic medical  
5 records, each RRS trigger had been assessed by GWTG-R data abstractors dichotomously – as  
6 either present or not present – for each patient in the study sample.

### 7 *Covariates and Outcome Variables*

8 Several outcomes of interest were identified based on previous RRS research (7-11), with  
9 hospital mortality chosen as the primary outcome of interest. Secondary outcomes of interest  
10 included: IHCA, acute respiratory compromise (or ARC, which is defined as inadequate  
11 respiratory effort necessitating emergent intervention and assisted ventilation), transfer to  
12 critical care, limitations placed on code status (defined as “Do Not Resuscitate” or similar orders  
13 limiting scope of treatment placed either during or after the RRS event), and any serious adverse  
14 event (defined as any combination of the other outcomes of interest occurring during the same  
15 admission as the RRS event). Several patient characteristics were considered and controlled for  
16 in the analyses for this study including age at time of RRS event, sex, race, ethnicity, primary  
17 admitting diagnosis, time of RRS event (event occurred on day versus night shift, or on a weekday  
18 versus a weekend), and specialty care received during admission prior to RRS event. Further  
19 details describing the operational definitions of the outcome variables and patient characteristic  
20 variables are given in Supplemental Table 1.

## 21 **Statistical Analysis**

### 22 *Cluster Analyses*

1 We used descriptive statistics (frequencies, proportions, percentages) to characterize  
2 patients with multiple RRS triggers among each of the 20 RRS triggers in the study sample. Since  
3 triggers occurring with a frequency of less than 3% do not have sufficient variability to contribute  
4 to the cluster analyses, we excluded any RRS trigger occurring in less than 3% of the sample from  
5 subsequent analyses.

6 A combination of cluster analysis methods was used to group the entire study sample into  
7 mutually exclusive RRS trigger clusters. K-means cluster analysis is a powerful and widely used  
8 method for determining data clusters; however, it requires *a priori* knowledge of how many  
9 clusters are expected to form in a given dataset (29). Hierarchical cluster analysis is a separate  
10 method that can be used to help determine the optimal number of clusters in a dataset and can  
11 be used in conjunction with k-means cluster analysis (23,29).

12 The sample was randomly split into a training sample (approximately 67%) and a testing  
13 sample (approximately 33%). Hierarchical cluster analysis was performed on the RRS trigger data  
14 of training sample and the results were reviewed by the research team to determine the ideal  
15 number of clusters to be used in the k-means cluster analyses. Using the ideal number of clusters  
16 identified in the hierarchical cluster analysis, k-means cluster analyses were then performed on  
17 the training and testing samples to determine patient membership into RRS trigger clusters.  
18 Discriminant analyses were performed on both samples with the RRS triggers as predictors of  
19 cluster membership to assess how well the identified clusters accounted for the variability in the  
20 data (22). Since the inclusion criteria required that at least two RRS triggers be documented as  
21 being used to activate a RRS event, no RRS trigger data was documented as missing for any  
22 patient included in the cluster analyses. The entire study sample was grouped into the RRS



1 clusters at the completion of the cluster analyses, and subsequent analyses were performed on  
2 the entire study sample. The prevalence of RRS triggers in each cluster were described, and any  
3 trigger present for at least half of the patients in a cluster was determined to be a characterizing  
4 or predominant trigger for that cluster.

5 All cluster analyses were performed using SPSS version 24 (IBM Corp, Armonk, NY, 2016).

#### 6 *Multilevel Logistic Regression Models*

7 To examine how patient characteristics varied across RRS trigger clusters, we first used  
8 descriptive statistics (means, standard deviation, frequencies, proportions) to characterize the  
9 patient characteristic variables within each RRS trigger cluster. Approximately 5% of the study sample  
10 was missing at least one value for at least one patient characteristic variable; therefore, multiple  
11 imputation was considered appropriate for the study sample (using ten imputed datasets) and was  
12 used to handle missing values for the patient characteristics in the analyses. Pearson's chi-squared  
13 and ANOVA tests were used to examine differences in patient characteristics across RRS trigger  
14 clusters for the entire study sample.

15 Multilevel logistic regression models with patients nested within hospitals, adjusting for  
16 patient characteristics (age, sex, race, ethnicity, illness category (based on admission diagnosis),  
17 discharged from an intensive care unit (ICU) any time prior to the initial RRS event, discharged from  
18 an ICU within 24 hours prior to the initial RRS event, discharged from the emergency department  
19 within 24 hours prior to the initial RRS event, received sedation within 24 hours prior to the initial  
20 RRS event, and timing of the initial RRS event), were then used to determine the associations  
21 between RRS trigger clusters and patient outcomes. Frequencies and proportions were used to  
22 characterize outcomes (hospital mortality, IHCA, ARC, transfer to critical care, limitations placed on

1 code status, and any serious adverse event) for each RRS trigger cluster. Separate multilevel logistic  
2 regression models with patients nested within hospitals were conducted for the outcomes of interest  
3 related to RRS events. Patient characteristics were included as covariates in the first level of the  
4 models and hospital clustering effects were accounted for in the second level.

5 The above statistical tests were performed using Stata version 16.1 (StataCorp, College  
6 Station, TX, 2019).

## 7 **Results**

### 8 **Study Sample Characteristics**

9 The mean age in the study sample was 66 years (SD=17), and 51% of the sample was  
10 female. Patients who identified as White comprised 73.0% of the sample, while 23.8% of the  
11 sample identified themselves through another racial identity (labeled as “All other races” in this  
12 study). Approximately 4.6% of the study sample identified as Hispanic compared to 95.4% as non-  
13 Hispanic.

### 14 **Cluster Analyses**

15 Overall, 13 of the 20 RRS triggers assessed were present in at least 3% of the RRS events  
16 in the data set (see Table 2 for details on the prevalence of these RRS triggers). The seven RRS  
17 triggers excluded from the cluster analyses due to a prevalence of less than 3% in the study  
18 sample were: patient or family concern, chest pain, acute decrease urinary output, critical lab  
19 abnormality, risk factor score, excessive bleeding, and uncontrolled pain. Using the results of the  
20 hierarchical cluster analysis, the research team examined 4, 5, 6, and 7 cluster solutions for  
21 clinical interpretability and significance of each possible solution. A consensus was reached that  
22 the 6-cluster solution would be optimal to inform the subsequent k-means clusters analyses on

1 the training (n=88,431) and testing (n=45,975) samples. Discriminant analyses performed to  
2 assess for goodness-of-fit of the final RRS trigger clusters resulted in 93.4% of patients into the  
3 same clusters as the cluster analyses in the training sample (with a canonical correlation  
4 coefficient of 0.946), and 94.3% of patients into the same clusters as the cluster analyses in the  
5 testing sample (with a canonical correlation coefficient of 0.949). This indicates a high degree of  
6 agreement in the classification of patients to clusters between the cluster analyses and the  
7 discriminant analyses and validates the results of the cluster analyses.

8 Clusters 1, 2, and 3 were all primarily defined by at least one respiratory-associated RRS  
9 trigger (Table 3). Cluster 1 was exclusively characterized by RRS triggers related to respiratory  
10 deterioration – tachypnea, new onset difficulty in breathing, and decreased oxygen saturation.  
11 Cluster 2 was primarily characterized by tachypnea, decreased oxygen saturation, and staff  
12 concern. Of note, no RRS triggers related to cardiac, circulatory, and neurological issues were  
13 common in either Cluster 1 or 2, and new onset difficulty in breathing was not common in Cluster  
14 2. Cluster 3 was predominantly defined by respiratory depression, decreased oxygen saturation,  
15 and mental status changes. No cardiac or circulatory RRS triggers were common in Cluster 3.  
16 Cluster 4 was predominantly characterized by tachycardia and staff concern, with low  
17 frequencies of respiratory or neurological RRS triggers. Cluster 5 was predominantly  
18 characterized only by mental status changes. To clarify, this does not mean that the patients  
19 grouped into Cluster 5 only had mental status changes as their sole RRS trigger, but rather, this  
20 was the only RRS trigger that a majority of the patients in this cluster had in common. Finally,  
21 Cluster 6 was primarily characterized by hypotension and staff concern, with no common

1 respiratory or neurological RRS triggers identified. Additional details of the prevalence of RRS  
2 triggers in each cluster in the study sample are given in Table 3.

### 3 **Patient Characteristic Differences between Clusters**

4 We found statistically significant differences between the RRS trigger clusters across all  
5 patient characteristics examined (Table 4). For Cluster 4, the mean age (63 years) was lower than  
6 all other RRS trigger clusters (range 66 to 68 years), and patients identifying under “All other  
7 races” accounted for more than a quarter of the patients in Clusters 4, 5, and 6 as compared to  
8 Clusters 1, 2 and 3 (22% or less). Larger proportions of the patients in Clusters 4 and 6 had cardiac  
9 admitting diagnoses (29% and 29%, respectively) versus non-cardiac admitting diagnoses when  
10 compared to the other RRS trigger clusters (23% or less). Compared to the other RRS trigger  
11 clusters, fewer patients in Clusters 5 and 6 were discharged from an ICU prior to their initial RRS  
12 event, while more patients in Clusters 3 and 6 received sedation within the 24 hours prior to their  
13 initial RRS event. The initial RRS event for patients in Cluster 5 (56%) more often occurred during  
14 the day shift as compared to the other RRS trigger clusters (54% or less).

### 15 **Outcome Differences between Clusters**

16 We also found statistically significant differences between RRS trigger clusters across all  
17 outcomes examined (Table 5). For example, patients in Cluster 3 had the highest reported  
18 mortality (28%) compared to the other RRS trigger clusters (20% or less). Patients in Cluster 3  
19 also had the highest reported incidences of IHCA (5%) compared to other clusters (2% or less).  
20 Additional details regarding differences in adverse outcomes across RRS trigger clusters can be  
21 found in Table 5.

### 22 **Multilevel Logistic Regression Models**



1 patient characteristics and the clustering effects of patients who experienced RRS events within  
2 the same hospitals, patients with certain clusters were statistically more likely to experience ARC  
3 or IHCA. Of note, the likelihood of any adverse patient outcomes was at least two times higher  
4 for the patients in Cluster 3 (primarily characterized by respiratory depression, decreased oxygen  
5 saturation, mental status changes) compared to patients with other clusters. Each cluster had its  
6 own unique associative profile across the outcomes examined.

7         Currently, METs are activated using both clinical judgement criteria, such as staff concern,  
8 and objective criteria, such as abnormal variations in vital signs (27). These parameters may be  
9 aggregated into early warning scores (EWS) or used as single threshold parameters for the  
10 purposes of activation (8,12). Previous studies have shown that abnormal variations in vital signs  
11 are often present many hours prior to RRS events and adverse patient outcomes, such as IHCA  
12 (28). Additionally, recent work suggests that combinations of subjective clinical judgement  
13 criteria and multiple objective criteria may improve early detection of acutely deteriorating  
14 patients, thus improving RRS interventions and outcomes for these vulnerable patients (17, 27,  
15 28). This study adds to the current understanding of RRSs, especially the afferent limb, by  
16 examining the patterns in which subjective and objective RRS triggers co-occur through the  
17 conceptualization of RRS trigger clusters.

18         Given that patients whose RRS events were activated using multiple RRS triggers have  
19 been shown to be more likely to experience IHCA or mortality (16,17), it is not surprising that all  
20 RRS trigger clusters we identified were associated with high likelihood of hospital mortality  
21 (OR=1.35 or greater). The odds ratio for mortality was nearly double among those patients in  
22 Cluster 3 (respiratory depression, decreased oxygen saturation, and mental status changes) as

1 compared to the other RRS trigger clusters suggesting it strongly defines severe clinical  
2 deterioration. In comparing the defining triggers among each of the clusters, Cluster 3 is unique  
3 in that it is the only RRS trigger cluster with prevalent triggers involving more than one organ  
4 system – respiratory (100% of patients in the cluster had the respiratory depression trigger  
5 present and 45% had the decreased oxygen saturation trigger present) and neurological (52% of  
6 patients had the mental status change trigger present). This suggests that when multiple RRS  
7 triggers representing multiple organ systems are present, patients may be further along in their  
8 deterioration process and/or experiencing a more catastrophic event resulting in a higher risk for  
9 hospital mortality, IHCA, or ARC. This finding may be able to be used to guide management at the  
10 bedside and inform triage decisions with a goal of targeting a reduction in these adverse  
11 outcomes for these patients. This finding should also be taken into consideration in in possible  
12 reworking how EWSs function. EWSs often assign “scores” based on how far outside of “normal”  
13 parameters each vital sign is. Our findings suggest that these simple methods of aggregating  
14 scores are often not sufficient, and that the manner in which these signs and symptoms occur  
15 together should also be taken into account when creating EWSs.

16 Previously reported findings have suggested that staff concern as a RRS trigger is  
17 associated with decreased incidence of adverse outcomes following RRS events (24). Here, the  
18 defining triggers of Clusters 4 and 6 each included staff concern and one other cardiovascular  
19 RRS trigger—tachycardia in Cluster 4 and hypotension in Cluster 6. Cluster 2 also has staff concern  
20 as a defining RRS trigger; however, Cluster 2 also had two additional respiratory defining RRS  
21 triggers as opposed to Clusters 4 and 6 which each only had one other physiological defining RRS  
22 trigger in addition to staff concern. Some interesting differences were noted between these

1 clusters, including how they were associated with IHCA—the patients in cluster 2 had a non-  
2 significant lower likelihood of experiencing IHCA, the patients in Cluster 4 were significantly less  
3 likely to experience IHCA, and the patients in Cluster 6 were significantly more likely to  
4 experience IHCA. While these results contradict some of the previous findings related to the  
5 seemingly protective nature of the staff concern trigger, it is important to note that others have  
6 found that the use of respiratory triggers to activate RRS events is associated with increased  
7 likelihood of adverse outcomes (16,17). This could indicate that while staff concern as a trigger  
8 may indicate an opportunity for more aggressive early interventions to avoid adverse outcomes,  
9 the physiological triggers that occur with that concern may temper its potentially protective  
10 effects. Further study to elucidate the underlying mechanisms behind these differences is  
11 paramount.

12 This study highlights several key areas for future RRS research. Many previous studies  
13 have added critical knowledge about the importance of triggers in the afferent RRS limb and how  
14 they contribute to recognition of clinical deterioration and outcomes. For example, Shappell and  
15 colleagues (2018) examined associations between RRS triggers and outcomes and found that the  
16 presence of respiratory triggers were associated with increased risk of mortality (17). While such  
17 studies have been important in furthering our understanding of how triggers relate to adverse  
18 outcomes, they have tended to examine triggers grouped together by organ system (respiratory  
19 triggers, cardiovascular triggers, etc.). Our findings indicate that having a better understanding  
20 of RRS trigger clusters that cross organ system boundaries may provide key insights into early  
21 recognition of clinical deterioration. We found that almost half of METs are activated using more  
22 than one trigger, further highlighting the importance of examining MET activation using multiple



1 triggers and RRS trigger clusters in further detail. Additionally, the RRS trigger clusters identified  
2 and defined in this study should be considered for use in bedside decision-making during RRS  
3 events especially for the purposes of triage to a higher level of care. Furthermore, RRS trigger  
4 clusters may also improve the predictive abilities of early warning scoring systems and machine  
5 learning algorithms designed to help clinicians better detect clinical deterioration and improve  
6 patient outcomes.

## 7 **Limitations**

8         This study has several limitations. First, hospitals participate in the GWTG-R modules  
9 voluntarily and they may not be representative of hospitals across the United States. Further  
10 study of the use of multiple RRS triggers to activate RRS events, outside of this registry, is  
11 warranted. An additional limitation is the widespread availability of clustering algorithms and  
12 corresponding lack of a gold standard in their applications in healthcare research. Use of different  
13 clustering algorithms may result in different RRS trigger clusters than those described here (30).  
14 Another potential limitation is that information regarding patients' past medical histories and  
15 comorbidities are not captured in the GWTG-R MET module. However, patient comorbidities may  
16 or may not accurately predict acute clinical deterioration and patient outcomes following serious  
17 adverse events (25), so the lack of this patient information may or may not have affected our  
18 findings. Additionally, the GWTG-R modules do not report data related to MET composition. How  
19 team composition of the efferent limb affects outcomes remains a key area in need of further  
20 study (8). Many studies provide limited data on team composition. One recent study found that  
21 dedicated interdisciplinary teams are associated with fewer adverse outcomes related to  
22 cardiopulmonary resuscitation (26) but similar comparisons are lacking in the RRS literature.

1 Given that RRS triggers are part of the afferent limb and METs are part of the efferent limb, the  
2 lack of information regarding team composition may not have been essential to conceptualizing  
3 the trigger clusters. However, future studies examining the spectrum of RRSs should study  
4 afferent and efferent limbs together to better understand their relationships with patient  
5 outcomes. Just as predictive modeling and machine learning algorithms can provide improved,  
6 patient-specific predictions of outcomes, future RRS research should also examine how  
7 organization-specific factors are associated with outcomes related to the optimization of RRSs.  
8 In examining organization factors along with patient-specific variables across the afferent and  
9 efferent limbs of RRSs, we will be able to more fully answer how RRSs can be best implemented.

## 10 **Conclusions**

11 This study of a large registry of adult patients experiencing RRS events demonstrated that  
12 activation triggers, when occurring in multiples, associate into novel patterns resulting in RRS  
13 trigger clusters. All clusters were associated with increased risk of hospital mortality. Cluster 4  
14 was associated with a lower risk of IHCA, while Clusters 3 and 6 were associated with an increased  
15 risk of IHCA. RRS trigger clusters could be crucial in guiding bedside care and triage, improving  
16 EWSs and prediction algorithms, and helping clinicians and researchers better detect and treat  
17 clinical deterioration.

18

## Acknowledgements

The Get With The Guidelines® programs are provided by the American Heart Association. Hospitals participating in the registry submit clinical information regarding the medical history, hospital care, and outcomes of consecutive patients hospitalized for cardiac arrest using an online, interactive case report form and Patient Management Tool™ (IQVIA, Parsippany, New Jersey). IQVIA (Parsippany, New Jersey) serves as the data collection (through their Patient Management Tool – PMT™) and coordination center for the American Heart Association/American Stroke Association Get With The Guidelines® programs. The University of Pennsylvania serves as the data analytic center and has an agreement to prepare the data for research purposes. All participating institutions were required to comply with local regulatory and privacy guidelines and, if required, to secure institutional review board approval. Because data were used primarily at the local site for quality improvement, sites were granted a waiver of informed consent under the common rule. We would like to acknowledge the efforts and contributions of the American Heart Association's Get With The Guidelines®-Resuscitation Adult Research Task Force members: Anne Grossestreuer PhD; Ari Moskowitz MD; Dana Edelson MD MS; Joseph Ornato MD; Mary Ann Peberdy MD; Matthew Churpek MD MPH PhD; Monique Anderson Starks MD MHS; Paul Chan MD MSc; Saket Girotra MBBS SM; Sarah Perman MD MSCE; and, Zachary Goldberger MD MS.

### Sources of Funding

Rebecca J. Piasecki received support from the Predoctoral Fellowship in Interdisciplinary Training in Cardiovascular Health Research (T32 NR012704), the Philip D. Raso Scholarship provided by Nurses Educational Funds, Inc., and the Ruth L. Kirschstein Predoctoral Individual National Research Service Award (1F31NR018362-01A1).

Erin M. Spaulding received support from the Postdoctoral Fellowship in Cardiovascular Epidemiology Institutional Training (NIH/NHLBI T32 HL007024).

## Disclosures

None.

## References

1. Jones DA, DeVita MA, Bellomo R. Rapid-Response Teams. *N Engl J Med*. 2011;365(2):139-146. doi:10.1056/NEJMra0910926; PMID: 21751906.
2. Wachter RM, Pronovost PJ. The 100,000 lives campaign: A scientific and policy review. *Jt Comm J Qual Patient Saf*. 2006;32(11):621-627. doi:10.1016/S1553-7250(06)32081-8; PMID: 17120921.
3. Jones D, Rubulotta F, Welch J. Rapid response teams improve outcomes: yes. *Intensive Care Medicine*. 2016:1-3. doi: 10.1007/s00134-016-4219-5; PMID: 26850332.
4. Maharaj R, Stelfox HT. Rapid response teams improve outcomes: no. *Intensive Care Medicine*. 2016:1-3. doi: 10.1007/s00134-016-4246-2; PMID: 26850330.
5. Wendon J, Hodgson C, Bellomo R. Rapid response teams improve outcomes: we are not sure. *Intensive Care Medicine*. 2016:1-3. doi: 10.1007/s00134-016-4253-3; PMID: 26850331.
6. Lee A, Bishop G, Hillman KM, Daffurn K. The Medical Emergency Team. *Anaesth Intensive Care*. 1995;23(2):183-186. doi:10.1097/CCM.0b013e3182a27413; PMID: 7793590.
7. DeVita MA, Bellomo R, Hillman K, Kellum J, Rotondi A, Teres D, Auerbach A, Chen WJ, Duncan K, Kenward G, Bell M, Buist M, Chen J, Bion J, Kirby A, Lighthall G, Ovreveit J, Braithwaite RS, Gosbee J, Milbrandt E, Peberdy M, Savitz L, Young L, Harvey M, Galhotra S. Findings of the First Consensus Conference on Medical Emergency Teams\*. *Crit Care Med*. 2006;34(9):2463-2478. doi:10.1097/01.CCM.0000235743.38172.6E; PMID: 16878033.

8. Maharaj R, Raffaele I, Wendon J. Rapid response systems: a systematic review and meta-analysis. *Crit Care*. 2015;19(1):254. doi:10.1186/s13054-015-0973-y; PMID: 26070457; PMCID: PMC4489005.
9. Winters BD, Pham JC, Hunt EA, Guallar E, Berenholtz S, Pronovost PJ. Rapid response systems: a systematic review. *Crit Care Med*. 2007;35(5):1238-1243. doi:10.1097/01.CCM.0000262388.85669.68; PMID: 17414079.
10. Winters BD, Weaver SJ, Pfoh ER, Yang T, Cuong J, Dy SM. Rapid-response systems as a patient safety strategy: A systematic review. *Ann Intern Med*. 2013;158(5 PART 2):417-425. doi:10.7326/0003-4819-158-5-201303051-00009; PMID: 23460099; PMCID: PMC4695999.
11. Solomon RS, Corwin GS, Barclay DC, Quddusi SF, Dannenberg MD. Effectiveness of rapid response teams on rates of in-hospital cardiopulmonary arrest and mortality: A systematic review and meta-analysis. *J Hosp Med*. 2016;11(6):438-445. doi:10.1002/jhm.2554; PMID: 26828644.
12. Chan PS, Jain R, Nallamotheu BK, Berg RA, Sasson C. Rapid response teams: a systematic review and meta-analysis. *Arch Intern Med*. 2010;170(1):18. doi:10.1001/archinternmed.2009.424; PMID: 20065195.
13. Silva R, Saraiva M, Cardoso T, Aragão IC. Medical Emergency Team: How do we play when we stay? Characterization of MET actions at the scene. *Scand J Trauma Resusc Emerg Med*. 2016;24(1):33. doi:10.1186/s13049-016-0222-7; PMID: 27000277; PMCID: PMC4802603.

14. Chen J, Bellomo R, Hillman K, Flabouris A, Finfer S. Triggers for emergency team activation: A multicenter assessment. *J Crit Care*. 2010;25(2). doi:10.1016/j.jcrc.2009.12.011; PMID: 20189754.
15. Churpek MM, Edelson DP, Lee JY, Carey K, Snyder A. Association between survival and time of day for rapid response team calls in a national registry. *Crit Care Med*. 2017; 45(10):1677-1682. doi: 10.1097/CCM.0000000000002620; PMID: 28742548; PMCID: PMC5600679.
16. Le Guen MP, Tobin AE, Reid D. Intensive care unit admission in patients following rapid response team activation: Call factors, patient characteristics and hospital outcomes. *Anaesth Intensive Care*. 2015;43(2):211-215. PMID: 25735687.
17. Shappell C, Snyder A, Edelson DP, Churpek MM. Predictors of in-hospital mortality after rapid response team calls in a 274 hospital nationwide sample. *Crit Care Med*. 2018 Jan 2. doi: 10.1097/CCM.0000000000002926 [Epub ahead of print]; PMID: 29293147.
18. Barsevick AM. "Symptom Clusters." (2016). *Department of Medical Oncology Faculty Papers*. Paper 58. <http://jdc.jefferson.edu/medoncfp/58>.
19. Raymond TT, Bonafide CP, Praestgaard A, Nadkarni VM, Berg RA, Parshuram CS, Hunt EA. Pediatric Medical Emergency Team Events and Outcomes: A Report of 3647 Events From the American Heart Association's Get With the Guidelines-Resuscitation Registry. *Hosp Pediatr*. 2016;6(2):57-64. doi:10.1542/hpeds.2015-0132; PMID: 26813980.
20. Peberdy MA, Kaye W, Ornato JP, Larkin GL, Nadkarni V, Mancini ME, Berg RA, Nichol G, Lane-Trullt T. Cardiopulmonary resuscitation of adults in the hospital: a report of



- 14720 cardiac arrests from the National Registry of Cardiopulmonary Resuscitation. *Resuscitation*. 2003;58(3):297-308. doi:10.1016/S0300-9572(03)00215-6; PMID: 12969608.
21. American Heart Association. Get With The Guidelines - Resuscitation overview. Get With The Guidelines - Resuscitation website. [http://www.heart.org/HEARTORG/Professional/GetWithTheGuidelines/GetWithTheGuidelines-Resuscitation/Get-With-The-Guidelines-Resuscitation-Overview\\_UCM\\_314497\\_Article.jsp#.WosiZ6jwZPY](http://www.heart.org/HEARTORG/Professional/GetWithTheGuidelines/GetWithTheGuidelines-Resuscitation/Get-With-The-Guidelines-Resuscitation-Overview_UCM_314497_Article.jsp#.WosiZ6jwZPY). October 27, 2017. Accessed February 19, 2018.
  22. Goodstein RE. An introduction to discriminant analysis. *Journal of Research in Music Education*. 1987;35:7-11.
  23. Perrin NA, Yragui NL, Hanson GC, Glass N. Patterns of workplace supervisor support desired by abused women. *Journal of Interpersonal Violence*. 2011;26(11):2264-2284. doi: 10.1177/0886260510383025; PMID: 20889534.
  24. Santiano N, Young L, Hillman K, Parr M, Jayasinghe S, Baramy LS, Stevenson J, Heath T, Chan C, Claire M, Hanger G. Analysis of Medical Emergency Team calls comparing subjective to “objective” call criteria. *Resuscitation*. 2009;80(1):44-49. doi:10.1016/j.resuscitation.2008.08.010; PMID: 18952358.
  25. Sandroni C, Nolan J, Cavallaro F, Antonelli M. In-hospital cardiac arrest: Incidence, prognosis and possible measures to improve survival. *Intensive Care Med*. 2007;33(2):237-245. doi:10.1007/s00134-006-0326-z; PMID: 17019558.

26. Nallamotheu BK, Guetterman TC, Harrod M, Kellenberg JE, Lehrich JL, Kronick SL, Krein SL, Iwashyna TJ, Saint S, Chan PS. How Do Resuscitation Teams at Top-Performing Hospitals for In-Hospital Cardiac Arrest Succeed? A Qualitative Study. *Circulation*. 2018 Jul 10;138(2):154-163. doi: 10.1161/CIRCULATIONAHA.118.033674. PMID: 29986959; PMCID: PMC6245659.
27. Lyons PG, Edelson DP, Churpek MM. Rapid response systems. *Resuscitation*. 2018 Jul;128:191-197. doi: 10.1016/j.resuscitation.2018.05.013. Epub 2018 May 16. PMID: 29777740; PMCID: PMC6147149.
28. Subbe CP, Bannard-Smith J, Bunch J, Champunot R, DeVita MA, Durham L, Edelson DP, Gonzalez I, Hancock C, Haniffa R, Hartin J, Haskell H, Hogan H, Jones DA, Kalkman CJ, Lighthall GK, Malycha J, Ni MZ, Phillips AV, Rubulotta F, So RK, Welch J; International Society for Rapid Response Systems. Quality metrics for the evaluation of Rapid Response Systems: Proceedings from the third international consensus conference on Rapid Response Systems. *Resuscitation*. 2019 Aug;141:1-12. doi: 10.1016/j.resuscitation.2019.05.012. Epub 2019 May 23. Erratum in: *Resuscitation*. 2019 Dec;145:93-94. PMID: 31129229.
29. Arai K and Barakbah AR. Hierarchical K-means: an algorithm for centroids initialization for K-means. *Reports of the Faculty of Science and Engineering*. 2007;36(1):25-31.
30. Sinha P, Spicer A, Delucchi KL, McAuley DF, Calfee CS, Churpek MM. Comparison of machine learning clustering algorithms for detecting heterogeneity of treatment effect in acute respiratory distress syndrome: A secondary analysis of three randomised

controlled trials. EBioMedicine. 2021 Nov 30;74:103697. doi:

10.1016/j.ebiom.2021.103697. Epub ahead of print. PMID: 34861492.

## Tables

**Table 1. Potential RRS triggers cited as reason for activating the MET\***

| RRS triggers included in GWTG-R MET Module data collection form |                               |                                  |
|-----------------------------------------------------------------|-------------------------------|----------------------------------|
| Staff concern                                                   | Tachycardia                   | Acute loss of consciousness      |
| Patient/family concern                                          | Hypotension                   | Suspected stroke                 |
| Respiratory depression                                          | Hypertensive emergency        | Acute decrease in urinary output |
| Tachypnea                                                       | Chest pain                    | Critical lab values              |
| New onset difficulty in breathing                               | Seizure                       | Excessive bleeding               |
| Decreased oxygen saturation                                     | Unexpected agitation/delirium | Uncontrolled pain                |
| Bradycardia                                                     | Decreased responsiveness      |                                  |

\*All variables in Table 1 are measured dichotomously.

**Table 2. Prevalence of RRS triggers used in cluster analysis in the entire study sample**

| RRS Trigger                       | Study Sample<br>(n=134,406)<br>No. (%) |
|-----------------------------------|----------------------------------------|
| Mental status change              | 55,697 (41.4)                          |
| Staff concern                     | 55,247 (41.1)                          |
| Decreased oxygen saturation       | 41,412 (30.8)                          |
| New onset difficulty in breathing | 33,160 (24.7)                          |
| Tachycardia                       | 33,020 (24.6)                          |
| Tachypnea                         | 28,967 (21.6)                          |
| Hypotension                       | 28,206 (21.0)                          |
| Acute loss of consciousness       | 8,577 (6.4)                            |
| Respiratory depression            | 8,082 (6.0)                            |
| Bradycardia                       | 6,706 (5.0)                            |
| Suspected acute stroke            | 6,588 (4.9)                            |
| Hypertensive emergency            | 6,115 (4.5)                            |
| Seizure                           | 5,934 (4.4)                            |

**Table 3. Percentages of RRS triggers present across RRS trigger clusters for the entire study sample**

| RRS triggers (%)                  | Cluster<br>(No. of patients) |                 |                |                 |                 |                 |
|-----------------------------------|------------------------------|-----------------|----------------|-----------------|-----------------|-----------------|
|                                   | 1<br>(n=28,205)              | 2<br>(n=15,750) | 3<br>(n=7,298) | 4<br>(n=18,786) | 5<br>(n=41,372) | 6<br>(n=22,995) |
| Respiratory depression            | 1                            | 1               | 100            | 1               | 0               | 1               |
| Tachypnea                         | 49                           | 50              | 6              | 26              | 2               | 4               |
| New onset difficulty in breathing | 100                          | 0               | 17             | 6               | 4               | 4               |
| Decreased oxygen saturation       | 60                           | 84              | 45             | 3               | 11              | 12              |

|                             |    |    |    |     |    |    |
|-----------------------------|----|----|----|-----|----|----|
| Bradycardia                 | 1  | 3  | 8  | 1   | 3  | 17 |
| Tachycardia                 | 25 | 31 | 10 | 100 | 4  | 0  |
| Hypotension                 | 4  | 3  | 14 | 36  | 0  | 82 |
| Hypertensive emergency      | 6  | 12 | 2  | 7   | 3  | 0  |
| Mental status change        | 10 | 8  | 52 | 13  | 91 | 33 |
| Acute loss of consciousness | 1  | 3  | 12 | 2   | 9  | 12 |
| Seizure                     | 1  | 2  | 2  | 2   | 11 | 1  |
| Suspected acute stroke      | 0  | 1  | 1  | 1   | 14 | 1  |
| Staff concern               | 32 | 53 | 33 | 51  | 33 | 53 |

**Table 4. Patient characteristics across RRS trigger clusters for the entire study sample**

| Cluster<br>(No. of patients)    | 1<br>(N=28,205)  | 2<br>(N=15,750)  | 3<br>(N=7,298)  | 4<br>(N=18,786)  | 5<br>(N=41,372)  | 6<br>(N=22,995)  | p-<br>value |
|---------------------------------|------------------|------------------|-----------------|------------------|------------------|------------------|-------------|
| No. of Patients<br>(% of Total) | <i>n</i><br>(%)  | <i>n</i><br>(%)  | <i>n</i><br>(%) | <i>n</i><br>(%)  | <i>n</i><br>(%)  | <i>n</i><br>(%)  |             |
| Age (mean ± SD)                 | 67 ± 16          | 67 ± 17          | 68 ± 16         | 63 ± 18          | 66 ± 17          | 67 ± 16          | <0.001      |
| Race                            |                  |                  |                 |                  |                  |                  | <0.001      |
| White                           | 21,384<br>(78.0) | 12,000<br>(79.0) | 5,604<br>(80.2) | 13,327<br>(73.3) | 29,313<br>(73.1) | 16,502<br>(74.2) |             |
| All other races                 | 6,047<br>(22.0)  | 3,189<br>(21.0)  | 1,387<br>(19.8) | 4,848<br>(26.7)  | 10,808<br>(26.9) | 5,752<br>(25.9)  |             |
| Ethnicity                       |                  |                  |                 |                  |                  |                  | <0.001      |
| Hispanic                        | 1,220<br>(4.3)   | 668<br>(4.2)     | 322<br>(4.4)    | 971<br>(5.2)     | 1,928<br>(4.7)   | 1,095<br>(4.8)   |             |
| Non-Hispanic                    | 26,985<br>(95.7) | 15,082<br>(95.8) | 6,976<br>(95.6) | 17,815<br>(94.8) | 39,444<br>(95.3) | 21,900<br>(95.2) |             |
| Sex                             |                  |                  |                 |                  |                  |                  | <0.001      |
| Male                            | 14,142<br>(50.1) | 8,116<br>(51.5)  | 3,536<br>(48.5) | 9,410<br>(50.1)  | 19,440<br>(47.0) | 11,157<br>(48.5) |             |
| Female                          | 14,062<br>(49.9) | 7,633<br>(48.5)  | 3,762<br>(51.6) | 9,375<br>(49.9)  | 21,929<br>(53.0) | 11,833<br>(51.5) |             |
| Illness Category                |                  |                  |                 |                  |                  |                  | <0.001      |
| Medical                         | 24,446<br>(86.7) | 13,313<br>(84.6) | 6,002<br>(82.3) | 15,309<br>(81.5) | 34,673<br>(83.9) | 18,553<br>(80.7) |             |
| Surgical                        | 3,754<br>(13.3)  | 2,429<br>(15.4)  | 1,294<br>(17.7) | 3,475<br>(18.0)  | 6,667<br>(16.1)  | 4,435<br>(19.3)  |             |
| Cardiac                         | 6,175<br>(21.9)  | 3,183<br>(20.2)  | 1,712<br>(23.5) | 5,358<br>(28.5)  | 7,161<br>(17.3)  | 6,779<br>(29.5)  | <0.001      |
| Non-Cardiac                     | 22,025<br>(78.1) | 12,559<br>(79.8) | 5,584<br>(76.5) | 13,426<br>(71.5) | 34,179<br>(82.7) | 16,209<br>(70.5) |             |

|                                                 |                  |                  |                 |                  |                  |                  |        |
|-------------------------------------------------|------------------|------------------|-----------------|------------------|------------------|------------------|--------|
| Discharged from ICU any time prior to RRS event |                  |                  |                 |                  |                  |                  |        |
| Yes                                             | 4,868<br>(17.3)  | 2,672<br>(17.0)  | 1,112<br>(15.2) | 2,629<br>(14.0)  | 5,464<br>(13.2)  | 2,952<br>(12.8)  | <0.001 |
| No                                              | 23,336<br>(82.7) | 13,076<br>(83.0) | 6,183<br>(84.8) | 16,156<br>(86.0) | 35,880<br>(86.8) | 20,040<br>(87.2) |        |
| Discharged from ICU 24h prior to RRS event      |                  |                  |                 |                  |                  |                  |        |
| Yes                                             | 1,521<br>(5.4)   | 823<br>(5.2)     | 325<br>(4.5)    | 698<br>(3.7)     | 1,476<br>(3.6)   | 699<br>(3.0)     | <0.001 |
| No                                              | 26,665<br>(94.6) | 14,921<br>(94.8) | 6,969<br>(95.5) | 18,080<br>(96.3) | 39,861<br>(96.4) | 22,289<br>(97.0) |        |
| Discharge from ED 24h prior to RRS event        |                  |                  |                 |                  |                  |                  |        |
| Yes                                             | 6,613<br>(23.5)  | 3,561<br>(22.6)  | 1,579<br>(21.6) | 4,548<br>(24.2)  | 9,600<br>(23.2)  | 5,843<br>(25.4)  | <0.001 |
| No                                              | 21,590<br>(76.6) | 12,185<br>(77.4) | 5,716<br>(78.4) | 14,236<br>(75.8) | 31,744<br>(76.8) | 17,149<br>(74.6) |        |
| Received sedation 24h prior to RRS event        |                  |                  |                 |                  |                  |                  |        |
| Yes                                             | 1,655<br>(5.9)   | 943<br>(6.0)     | 821<br>(11.3)   | 1,578<br>(8.4)   | 3,079<br>(7.5)   | 2,922<br>(12.7)  | <0.001 |
| No                                              | 26,547<br>(94.1) | 14,803<br>(94.0) | 6,472<br>(88.7) | 17,207<br>(91.6) | 38,264<br>(92.6) | 20,069<br>(87.3) |        |
| Timing of RRS Event                             |                  |                  |                 |                  |                  |                  |        |
| Day (07:00-18:59)                               | 14,305<br>(50.7) | 7,817<br>(49.6)  | 3,813<br>(52.3) | 9,572<br>(51.0)  | 23,284<br>(56.3) | 12,509<br>(54.4) | <0.001 |
| Night (19:00-06:59)                             | 13,900<br>(49.3) | 7,933<br>(50.4)  | 3,485<br>(47.8) | 9,214<br>(49.1)  | 18,088<br>(43.7) | 10,486<br>(45.6) |        |
| Weekend (19:00 F – 06:59 M)                     | 9,908 (35.1)     | 5,574<br>(35.4)  | 2,325<br>(31.9) | 6,528<br>(34.8)  | 13,609<br>(32.9) | 7,457<br>(32.4)  | <0.001 |
| Weekday (07:00 M – 18:59 F)                     | 18,297<br>(64.9) | 10,176<br>(64.6) | 4,973<br>(68.1) | 12,258<br>(65.3) | 27,763<br>(67.1) | 15,538<br>(67.6) |        |

**Table 5. Adverse patient outcomes across RRS trigger clusters for the entire study sample\***

| Cluster<br>(No. of patients)      | 1<br>(N=28,205)  | 2<br>(N=15,750)  | 3<br>(N=7,298)  | 4<br>(N=18,786)  | 5<br>(N=41,372)  | 6<br>(N=22,995)  | p-<br>value |
|-----------------------------------|------------------|------------------|-----------------|------------------|------------------|------------------|-------------|
| No. of Patients<br>(% of Total)   | <i>n</i><br>(%)  | <i>n</i><br>(%)  | <i>n</i><br>(%) | <i>n</i><br>(%)  | <i>n</i><br>(%)  | <i>n</i><br>(%)  |             |
| Hospital mortality                |                  |                  |                 |                  |                  |                  |             |
| Yes                               | 5,336<br>(18.9)  | 3,182<br>(20.2)  | 2,051<br>(28.1) | 2,729<br>(14.5)  | 5,161<br>(12.5)  | 4,206<br>(18.3)  | <0.001      |
| No                                | 22,868<br>(81.1) | 12,567<br>(79.8) | 5,247<br>(71.9) | 16,056<br>(85.5) | 36,190<br>(87.5) | 18,789<br>(81.7) |             |
| In-hospital cardiac arrest (IHCA) |                  |                  |                 |                  |                  |                  |             |
| Yes                               | 312<br>(1.1)     | 125<br>(0.8)     | 396<br>(5.4)    | 104<br>(0.6)     | 445<br>(1.1)     | 359<br>(1.6)     | <0.001      |
| No                                | 27,891<br>(98.9) | 15,624<br>(99.2) | 6,902<br>(94.6) | 18,681<br>(99.5) | 40,911<br>(98.9) | 22,636<br>(98.4) |             |

|                                      |                  |                  |                 |                  |                  |                  |        |
|--------------------------------------|------------------|------------------|-----------------|------------------|------------------|------------------|--------|
| Acute respiratory compromise (ARC)   |                  |                  |                 |                  |                  |                  |        |
| Yes                                  | 2,499<br>(8.9)   | 888<br>(5.6)     | 1,319<br>(18.1) | 430<br>(2.3)     | 1,612<br>(3.9)   | 659<br>(2.9)     | <0.001 |
| No                                   | 25,704<br>(91.1) | 14,861<br>(94.4) | 5,979<br>(81.9) | 18,355<br>(97.7) | 39,744<br>(96.1) | 22,336<br>(97.1) |        |
| Patient transferred to critical care |                  |                  |                 |                  |                  |                  |        |
| Yes                                  | 12,410<br>(44.0) | 5,939<br>(37.7)  | 3,649<br>(50.0) | 5,881<br>(31.3)  | 11,188<br>(27.1) | 8,619<br>(37.5)  | <0.001 |
| No                                   | 15,791<br>(56.0) | 9,809<br>(62.3)  | 3,647<br>(50.0) | 12,901<br>(68.7) | 30,168<br>(73.0) | 14,375<br>(62.5) |        |
| Limitations placed on code status    |                  |                  |                 |                  |                  |                  |        |
| Yes                                  | 6,423<br>(22.8)  | 3,548<br>(22.5)  | 1,907<br>(26.1) | 3,162<br>(16.8)  | 6,745<br>(16.3)  | 4,271<br>(18.6)  | <0.001 |
| No                                   | 21,782<br>(77.2) | 12,202<br>(77.5) | 5,391<br>(73.9) | 15,624<br>(83.2) | 34,627<br>(83.7) | 18,724<br>(81.4) |        |
| Any serious adverse event            |                  |                  |                 |                  |                  |                  |        |
| Yes                                  | 16,744<br>(59.4) | 8,628<br>(54.8)  | 5,064<br>(69.4) | 8,356<br>(44.5)  | 16,525<br>(39.9) | 11,508<br>(50.1) | <0.001 |
| No                                   | 11,461<br>(40.6) | 7,122<br>(45.2)  | 2,234<br>(30.6) | 10,430<br>(55.5) | 24,847<br>(60.1) | 11,487<br>(50.0) |        |

\*p-values obtained from Pearson's chi-square and ANOVA as appropriate

**Table 6. Associations between RRS trigger clusters and outcomes<sup>+</sup>**

| Cluster                                         | 1                        | 2                        | 3                        | 4                        | 5                  | 6                        |
|-------------------------------------------------|--------------------------|--------------------------|--------------------------|--------------------------|--------------------|--------------------------|
| <i>Odds Ratio<br/>(95% Confidence Interval)</i> | <i>OR<br/>(CI)</i>       | <i>OR<br/>(CI)</i>       | <i>OR<br/>(CI)</i>       | <i>OR<br/>(CI)</i>       | <i>OR<br/>(CI)</i> | <i>OR<br/>(CI)</i>       |
| Patient Outcomes                                |                          |                          |                          |                          |                    |                          |
| Hospital mortality                              | 1.62 **<br>(1.55 - 1.69) | 1.75 **<br>(1.66 - 1.84) | 2.77 **<br>(2.60 - 2.94) | 1.35 **<br>(1.28 - 1.42) | Ref.               | 1.70 **<br>(1.62 - 1.78) |
| In-hospital cardiac arrest (IHCA)               | 1.04<br>(0.89 - 1.20)    | 0.82<br>(0.67 - 1.00)    | 5.20 **<br>(4.50 - 6.01) | 0.57 **<br>(0.45 - 0.70) | Ref.               | 1.49 **<br>(1.29 - 1.72) |
| Acute respiratory compromise (ARC)              | 2.70 **<br>(2.52 - 2.90) | 1.56 **<br>(1.42 - 1.70) | 5.69 **<br>(5.22 - 6.20) | 0.54 **<br>(0.48 - 0.60) | Ref.               | 0.73 **<br>(0.66 - 0.80) |
| Patient transferred to critical care            | 2.23 **<br>(2.15 - 2.30) | 1.72 **<br>(1.65 - 1.80) | 2.69 **<br>(2.55 - 2.84) | 1.43 **<br>(1.37 - 1.49) | Ref.               | 1.73 **<br>(1.67 - 1.80) |
| Limitations placed on code status               | 1.44 **<br>(1.38 - 1.50) | 1.47 **<br>(1.41 - 1.55) | 1.83 **<br>(1.72 - 1.94) | 1.24 **<br>(1.18 - 1.30) | Ref.               | 1.23 **<br>(1.18 - 1.29) |
| Any serious adverse event                       | 2.24 **<br>(2.16 - 2.31) | 1.88 **<br>(1.81 - 1.96) | 3.39 **<br>(3.20 - 3.59) | 1.43 **<br>(1.37 - 1.48) | Ref.               | 1.62 **<br>(1.56 - 1.67) |

\*\* statistically significant (p<0.01)

<sup>+</sup> Covariates included in multilevel logistical regression models: age, race, ethnicity, sex, illness category, discharge from ICU any time prior to the initial RRS event, discharge from an ICU within 24 hours prior to the initial RRS event, discharge from the emergency department within 24 hours prior to the initial RRS event, received sedation within 24 hours prior to the initial RRS event, timing of the initial RRS event

## Supplemental Material

**Supplemental Table 1. Outcomes and patient characteristics variable definitions**

| Variable                                               | Operational Definition                                                                                             | Measurement Scale |
|--------------------------------------------------------|--------------------------------------------------------------------------------------------------------------------|-------------------|
| <b>Patient Outcomes</b>                                |                                                                                                                    |                   |
| Hospital mortality                                     | Yes or No                                                                                                          | Dichotomous       |
| In-hospital cardiac arrest (IHCA)                      | Yes or No                                                                                                          | Dichotomous       |
| Acute respiratory compromise (ARC)                     | Yes (inadequate respiratory effort necessitating emergent intervention and assisted ventilation) or No             | Dichotomous       |
| Patient transferred to critical care                   | Yes or No                                                                                                          | Dichotomous       |
| Limitations placed on patient's code status            | Yes or No                                                                                                          | Dichotomous       |
| Any serious adverse event                              | Yes (Hospital mortality, IHCA, ARC, patient transferred, and/or limitations placed on patient's code status) or No | Dichotomous       |
| <b>Patient Characteristics</b>                         |                                                                                                                    |                   |
| Age                                                    | Age in years at time of RRS event                                                                                  | Continuous        |
| Sex                                                    | Female or Male                                                                                                     | Dichotomous       |
| Race                                                   | White or All other races                                                                                           | Dichotomous       |
| Ethnicity                                              | Hispanic or Non-Hispanic                                                                                           | Dichotomous       |
| Primary diagnosis type                                 | Medical or Surgical                                                                                                | Dichotomous       |
|                                                        | Cardiac or Non-Cardiac                                                                                             | Dichotomous       |
| Discharged from specialty unit/care prior to RRS event | Patient discharged from ICU any time prior to RRS event? (Yes or No)                                               | Dichotomous       |
|                                                        | Patient discharged from ICU within 24 hours prior to RRS event? (Yes or No)                                        | Dichotomous       |
|                                                        | Patient discharged from ED within 24 hours prior to RRS event? (Yes or No)                                         | Dichotomous       |
|                                                        | Patient received sedation within 24 hours prior to RRS event? (Yes or No)                                          | Dichotomous       |
| RRS event timing                                       | Day (07:00 to 18:59) or Night (19:00 to 06:59)                                                                     | Dichotomous       |
|                                                        | Weekend (Friday 19:00 to Monday 06:59) or Weekday (Monday 07:00 to Friday 18:59)                                   | Dichotomous       |
